# Supplementary material for: Integrated analyses of the intestinal microbiome and transcriptome in NingXiang piglets
Source: Research Square preprint supplement (doi:10.21203/rs.3.rs-3888036/v1), 2024-01-29
Supplement: Supplementary file 1 [file 39df35cd985f8cf075eb6a20.docx]

**Table 1 Nutritive Ingredient**

| Item | Tryptophan supplementation | |
| --- | --- | --- |
|  | 0% | 0.2% |
| Ingredients% |  |  |
| Corn | 65 | 65 |
| Soybean meal (sol.) | 12 | 12 |
| Soybean | 10 | 10 |
| Fish meal | 4 | 4 |
| Whey dehydrated | 4 | 4 |
| Salt | 0.3 | 0.3 |
| Lysine | 0.74 | 0.74 |
| Threonine | 0.22 | 0.22 |
| Tryptophan | 0.00 | 0.20 |
| Methionine | 0.11 | 0.11 |
| Limestone powder | 0.59 | 0.59 |
| DCP | 1.104 | 1.104 |
| Zeolite powder | 0.25 | 0.05 |
| Premix | 1.686 | 1.686 |
| Total | 100 | 100 |
| Nutrient levels% |  |  |
| DE(MJ/KG) | 14.20 | 14.20 |
| CP | 17.58 | 17.58 |
| Tryptophan | 0.178 | 0.378 |

DCP: CaHPO4·2H2O; DE: Digestible Energy; CP: Crude protein

Premix: Phytase, 0.02%; Enzyme preparation, 0.05%; Multivitamin and minerals 726, 0.05%; Choline, 0.16%; Flavouring agent, 0.04%; sweetening agent, 0.03%; feed acidifier, 0.3%; ZnO, 0.16%; CuSO4·5H2O, 0.07%; MnSO4·H2O, 0.03%; ZnSO4·H2O, 0.01%; FeSO4·H2O, 0.06%; 1% KI, 0.002%; NaSeO, 0.002%; CoCl·6H2O, 0.002%; Glucose, 0.6%; Antioxidant, 0.05%; Mould inhibitor, 0.05%.

**Table S2 Primers sequences for RT-qPCR**

| Gene name |  | Sequence (5’ – 3’) |
| --- | --- | --- |
| *GAPDH* | Forward | GGTCGGAGTGAACGGATTT |
| Reverse | CATTTGATGTTGGCGGGAT |
| *TAD1* | Forward | TCTGGCTTCACCTCGCTCCT |
| Reverse | GCGGCGGCAGATGTCATAGA |
| *E-cadherin* | Forward | TTCAACCCAACCTCGTACCA |
| Reverse | CGCCTTCATTGGTTACTGGG |
| *WAS* | Forward | GTGATGACGATGACGACGATGA |
| Reverse | GCCTGGAAGCTGAGAGTGGAA |
| *HCLS1* | Forward | CCTCCTCCTGTCCTTCCTGAA |
| Reverse | TTGCCTGTCCATCCTCATCCA |
| *IL2* | Forward | CAGTGTTTAGTAGAAGAACTC |
| Reverse | TGACAAAAGGTAATCCATTTGTT |
| *IL17F* | Forward | CCCTGTCACTGCTGCTTCTG |
| Reverse | TCATGATTCCCGCCTTCAC |
| *IL-22* | Forward | CTACATCACCAACCGCACCT |
| Reverse | TCAGAGTTGGGGAACAGCAC |
| *IL-18* | Forward | AAAATGTCTACTCTCTCCTG |
| Reverse | ACTCAAACTGTATCTTATCATC |
| *IL-8* | Forward | TACGCATTCCACACCTTTC |
| Reverse | GGCAGACCTCTTTTCCATT |
| *PBD1* | Forward | TAACCTGCTTACGGGTCTTG |
| Reverse | TGCTGTGGCTTCTGGCTC |
| *PR39* | Forward | CTCTACCGCCTCCTGGAGCT |
| Reverse | GGCCCTTCATAATATCCCCCA |
| *Reg III γ* | Forward | ATCCTTCGTGTCCTCCCTGA |
| Reverse | TCCCACAGTAGCCAGGGTATGA |
| *Myd88* | Forward | CCTGTCCAACTGCCTCATTTG |
| Reverse | CTAAGTGTTCTAAGGATGTGTTTCTG |
| *β-actin* | Forward | CTTCCTGGGCATGGAGTCC |
| Reverse | GGCGCGATGATCTTGATCTTC |
| *TLR1* | Forward | TGCTGGATGCTAACGGATGTC |
| Reverse | AAGTGGTTTCAATGTTGTTCAAAGTC |


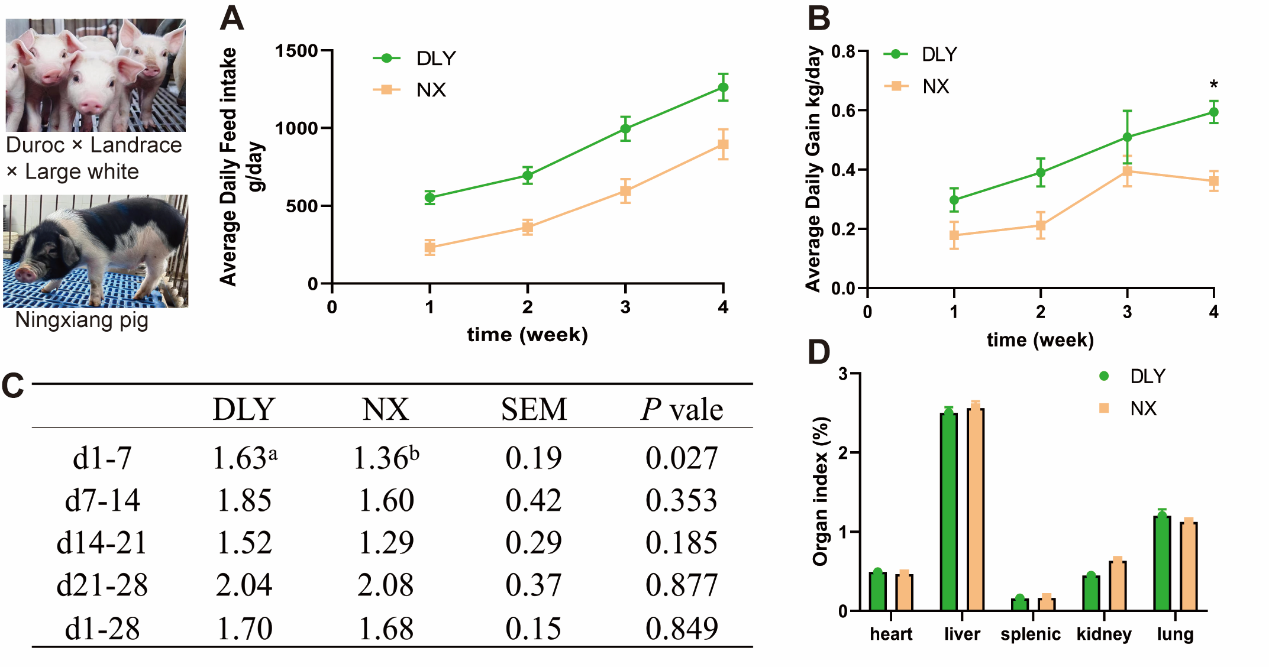


**Figure S1. (A-B)** Measurement of the average daily feed intake **(A)** and the average daily gain **(B)** between NX and DLY piglets (n=10 per group) in the 28 days of experimental trail. **(C)** Calculation of the feed conversion ratio between NX and DLY piglets (n=10 per group) in each week of 28 days of experimental trial. **(D)** Quantification of the organ index (%) = (organ weight/ body weight) x 100% between NX and DLY piglets (n=8 per group) after slaughter. Asterisks and distinct letters denote statistically significant differences (*p<0.05; distinct lettering, p<0.05).


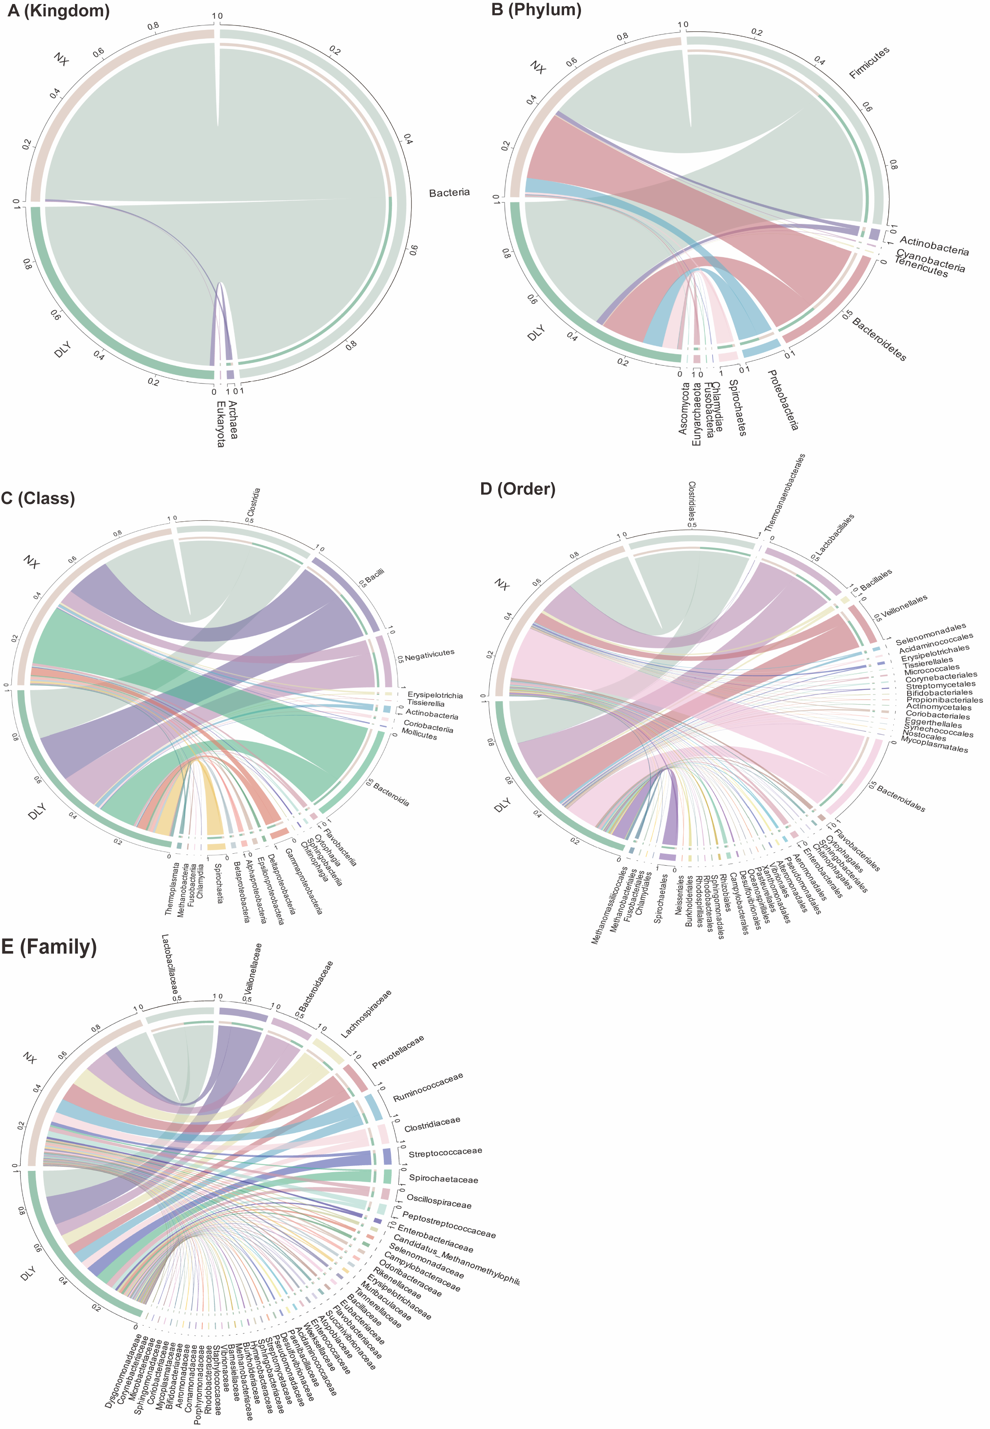


**Figure S2.** **(A-E)** The abundance of microorganisms in the colon of DLY and NX piglets (n=4) at the Kingdom **(A)**, Phylum **(B)**, Class **(C)**, Order **(D)** and Family levels **(E)**, respectively.


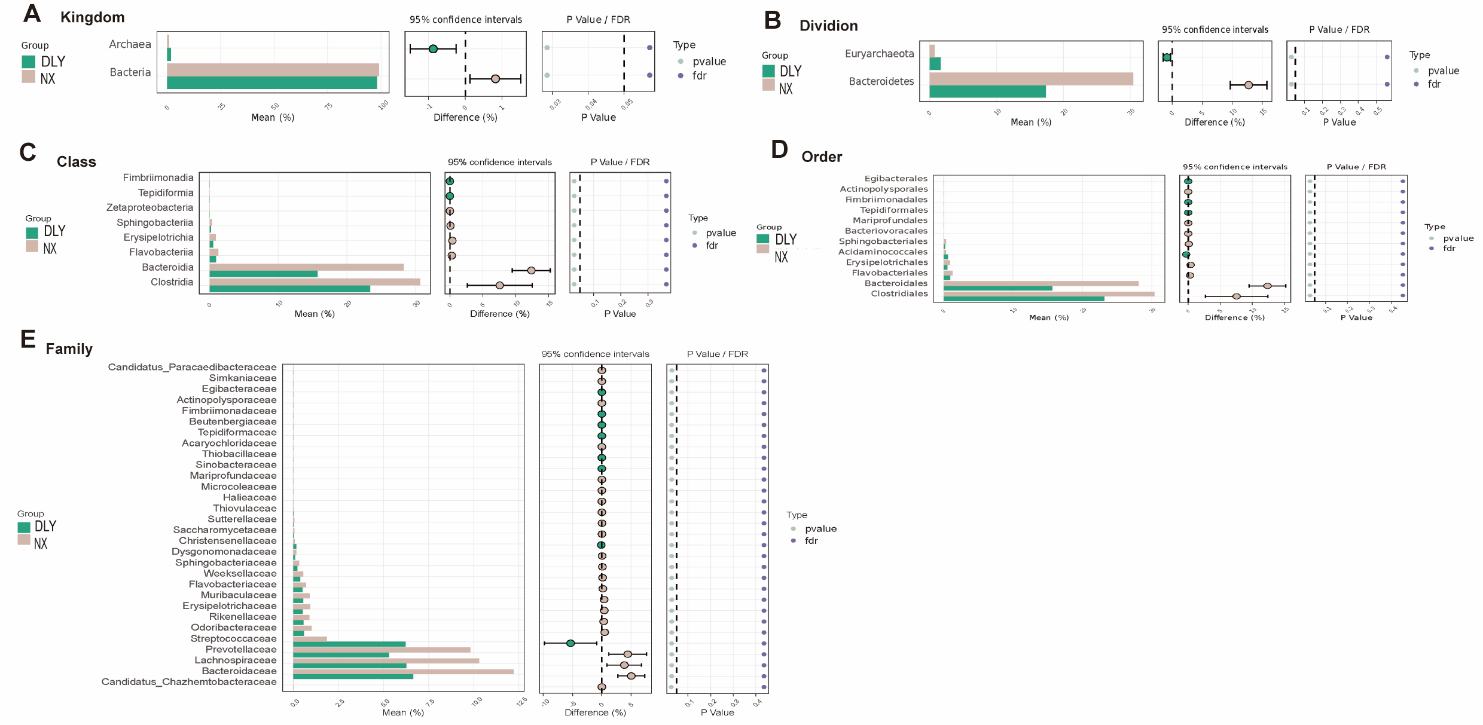


**Figure S3.** **(A-F)** STAMP analysis of the distinct microorganisms in the colon of NX and DLY piglets (n=4) at the Kingdom **(A)**, Division **(B)**, Class **(C)**, Order **(D)** and Family **(E),** respectively.


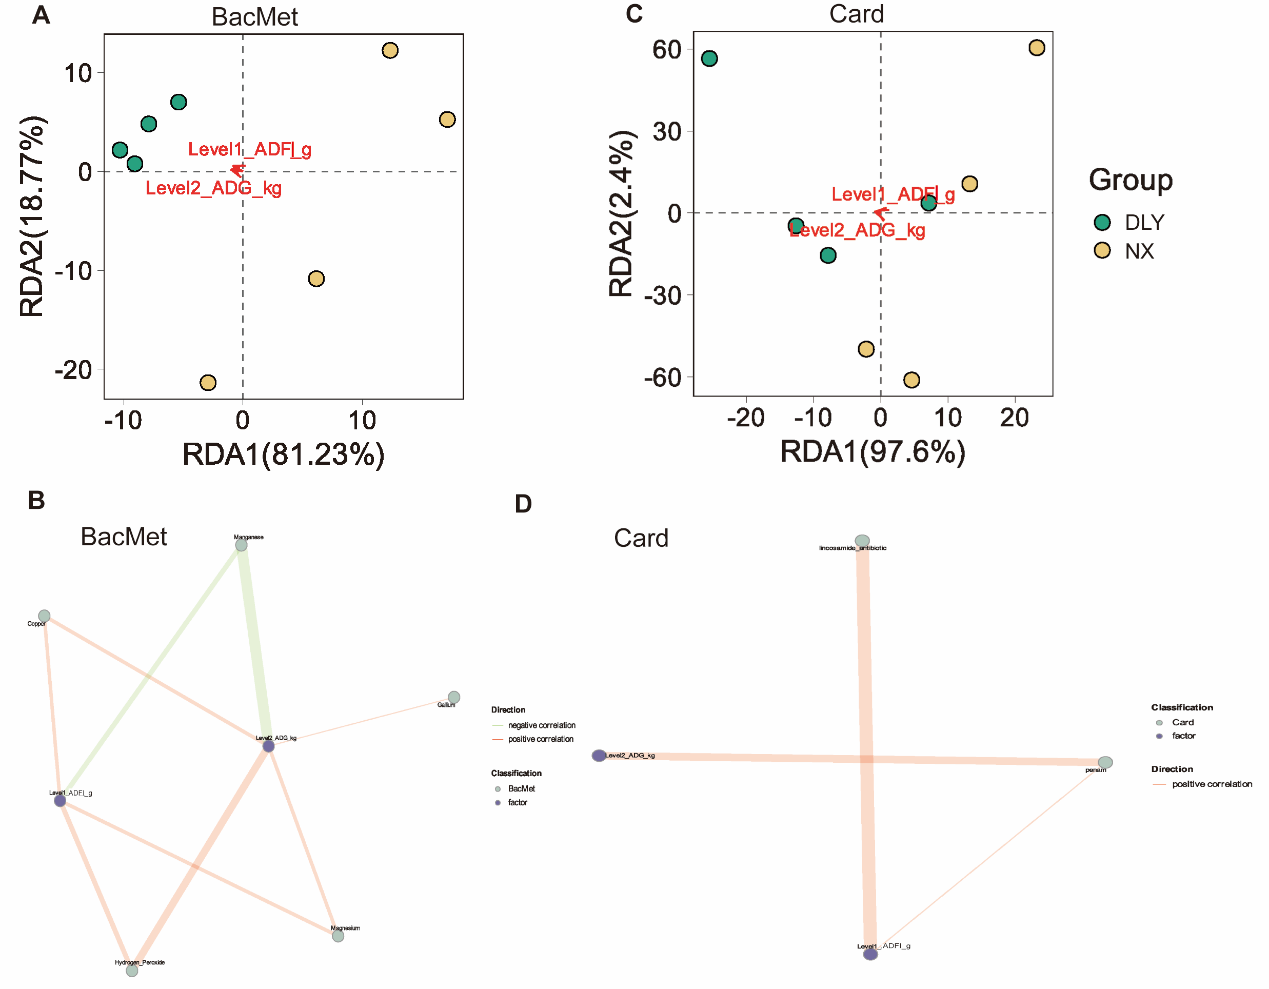


**FigureS4.** **(A-B)** The correlations between metal resistance genes and antibiotic resistance genes **(C-D)** and growth performance (ADFI and ADG) in NX and DLY piglets (n=4).


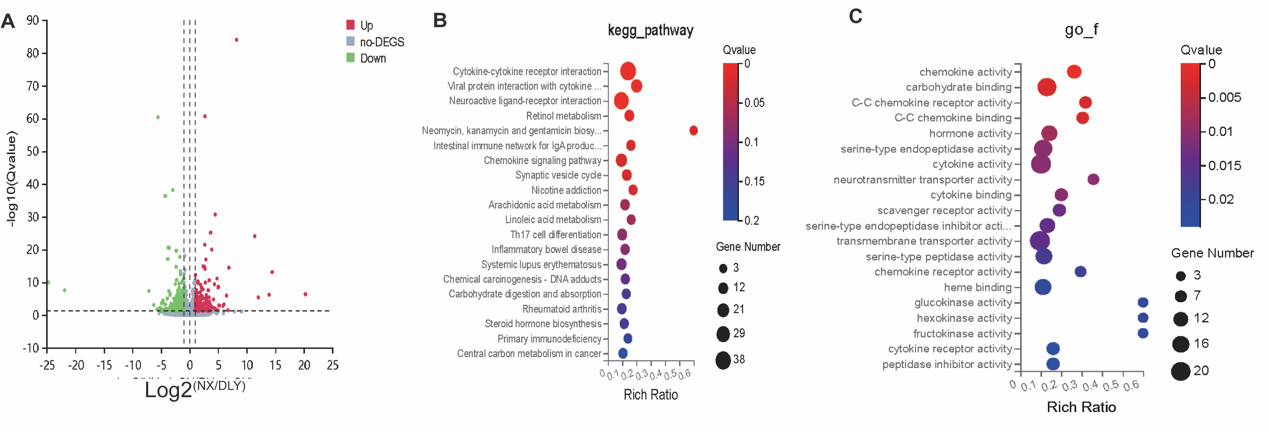


**Figure S5.** **(A)** Volcano plot of differentially expressed genes (DEGs) between NX and DLY piglets. **(B-C)** Kyoto Encyclopedia of Genes and Genomes (KEGG) **(B)** and Gene Ontology **(C)** analyses of DESs in the NX and DLY piglets (n=4).
